# Supplementary material for: Nonsterol Triterpenoids as Major Constituents ofOlea europaea
Source: Hindawi journal article supplement (doi:10.1155/2012/476595), 2012-01-01
Supplement: f1 [file 476595.f1.pdf]

**Table S1**Amounts of free sterols in various organs of *Olea europaea* tree

|                                                         | floral bud                     | stem                           | leaf bud                     | young leaf                     | mature leaf                   | young fruit <sup>a</sup>       | mature fruit <sup>b</sup>      |
|---------------------------------------------------------|--------------------------------|--------------------------------|------------------------------|--------------------------------|-------------------------------|--------------------------------|--------------------------------|
| <b>4.4-dimethylsterols</b>                              |                                |                                |                              |                                |                               |                                |                                |
| cycloartenol                                            | nd                             | nd                             | nd                           | nd                             | nd                            | nd                             | 31                             |
| 24-methylenecycloartanol                                | 2.7                            | 3                              | 2.9                          | 2.6                            | 2.5                           | nd                             | 255                            |
| <b>4<math>\alpha</math>-methylsterols</b>               |                                |                                |                              |                                |                               |                                |                                |
|                                                         | 0.5                            | 5.4                            | 4.9                          | 1.2                            | 1.2                           | traces                         | 24.9                           |
| <b>4-demethylsterols</b>                                |                                |                                |                              |                                |                               |                                |                                |
| brassicasterol                                          | 2.9                            | 0.3                            | traces                       | traces                         | traces                        | 1                              | 0                              |
| 24-methylcholesterol                                    | 43.3                           | 4.6                            | 2.7                          | 2.1                            | 1.6                           | 3.8                            | 19.4                           |
| stigmasterol                                            | 11.7                           | 4.8                            | 0.9                          | 5.6                            | 4.6                           | 3.6                            | 7.7                            |
| $\Delta^{5,23}$ -stigmastadienol                        | 0.2                            | 0.1                            | 0.1                          | 0.1                            | traces                        | nd                             | nd                             |
| clerosterol                                             | 2.8                            | 1.8                            | 0.5                          | 1.2                            | 1                             | 1.8                            | 6                              |
| sitosterol                                              | 590                            | 189                            | 37.2                         | 197                            | 143                           | 237                            | 588                            |
| isofucosterol                                           | 0.8                            | 0.2                            | 0.5                          | 0.3                            | traces                        | nd                             | 26.2                           |
| <b>Total amount (<math>\mu\text{g/g}</math> dry wt)</b> | <b>655 <math>\pm</math> 37</b> | <b>210 <math>\pm</math> 15</b> | <b>50 <math>\pm</math> 6</b> | <b>210 <math>\pm</math> 15</b> | <b>155 <math>\pm</math> 8</b> | <b>250 <math>\pm</math> 22</b> | <b>960 <math>\pm</math> 54</b> |

<sup>a</sup>Picked at 12 WAF (weeks after flowering); <sup>b</sup>Picked at 30 WAF [18]; nd: not detectable.

**Table S2**Amounts of esterified sterols in various organs of *Olea europaea* tree

|                                                         | floral bud                     | stem                         | leaf bud                       | young leaf                     | mature leaf                  | young fruit <sup>a</sup>     | mature fruit <sup>b</sup>      |
|---------------------------------------------------------|--------------------------------|------------------------------|--------------------------------|--------------------------------|------------------------------|------------------------------|--------------------------------|
| <b>4.4-dimethylsterols</b>                              |                                |                              |                                |                                |                              |                              |                                |
| cycloartenol                                            | nd                             | nd                           | nd                             | nd                             | nd                           | nd                           | 4.3                            |
| 24-methylenecycloartanol                                | 3                              | 1.8                          | 6.7                            | 6.3                            | 3                            | 2                            | 31.5                           |
| <b>4<math>\alpha</math>-methylsterols</b>               |                                |                              |                                |                                |                              |                              |                                |
| obtusifoliol                                            | 18.2                           | 7.5                          | 22.1                           | 21.4                           | 11.5                         | 0.2                          | 2.1                            |
| 24-methylenelophenol                                    | 1.8                            | 0.2                          | nd                             | nd                             | nd                           | 1.2                          | 1.1                            |
| cycloeucalenol                                          | 0.7                            | 0.1                          | 0.4                            | 9.1                            | nd                           | 0.7                          | 1.9                            |
| 24-ethylidenelophenol                                   | 1.5                            | nd                           | 0.3                            | 0.9                            | nd                           | 0.5                          | 9.9                            |
| <b>4-demethylsterols</b>                                |                                |                              |                                |                                |                              |                              |                                |
| 24-methylcholesterol                                    | 9.6                            | 0.9                          | 3.4                            | 2.2                            | 0.7                          | 1                            | 7                              |
| stigmasterol                                            | 2.4                            | 0.6                          | 3.8                            | 5.7                            | 1.8                          | 3.2                          | 2.2                            |
| $\Delta^{5,23}$ -stigmastadienol                        | 0.1                            | traces                       | 0.2                            | 0.2                            | nd                           | nd                           | nd                             |
| clerosterol                                             | 0.8                            | 0.3                          | 1                              | 1.2                            | 0.3                          | 0.3                          | 2                              |
| sitosterol                                              | 83                             | 36.6                         | 94                             | 117                            | 39.4                         | 27.3                         | 188                            |
| isofucoesterol                                          | 1.6                            | 0.6                          | 1.8                            | 4.7                            | 1.2                          | 7.1                          | 12.3                           |
| <b>Total amount (<math>\mu\text{g/g}</math> dry wt)</b> | <b>125 <math>\pm</math> 15</b> | <b>50 <math>\pm</math> 6</b> | <b>135 <math>\pm</math> 15</b> | <b>170 <math>\pm</math> 15</b> | <b>60 <math>\pm</math> 7</b> | <b>45 <math>\pm</math> 5</b> | <b>260 <math>\pm</math> 24</b> |

<sup>a,b</sup> see legend of table S1.

**Table S3**Amounts of free and esterified sterols in *Olea europaea* callus cultures

|                                                         | Free sterols                     | Esterified sterols             |
|---------------------------------------------------------|----------------------------------|--------------------------------|
| <b>4.4-dimethylsterols</b>                              |                                  |                                |
| cycloartanol                                            | 14 <sup>a</sup>                  |                                |
| 24-methylene cycloartanol                               | 84                               | 9.4                            |
| Total                                                   | <b>98</b>                        | <b>9.4</b>                     |
| <b>4<math>\alpha</math>-methylsterols</b>               |                                  |                                |
| obtusifoliol                                            | 16                               | 5.4                            |
| 24-methylenelophenol                                    | 32                               | 3.8                            |
| 24-methyllophenol                                       | 11.4                             | 6.8                            |
| cycloeucalenol                                          | 6.5                              | 2.6                            |
| 24-ethyl- <i>E</i> -23-dehydrolophenol                  | 10.5                             | 0.4                            |
| 24-ethyl lophenol                                       | 39                               | 0.9                            |
| 24-ethylidene lophenol                                  | 147                              | 0.9                            |
| Total                                                   | <b>261</b>                       | <b>21</b>                      |
| <b>4-demethylsterols</b>                                |                                  |                                |
| 24-methylcholesterol                                    | 25.1                             | 12.8                           |
| stigmasterol                                            | 15.3                             | 5.0                            |
| $\Delta^{5,23}$ -stigmastadienol                        | 0.74                             | 3.8                            |
| clerosterol                                             | 8.6                              | 5.1                            |
| sitosterol                                              | 729                              | 324                            |
| sitostanol                                              | 6.6                              |                                |
| isofucosterol                                           | 3.9                              | 8.8                            |
| $\Delta^{5,24}$ -stigmastadienol                        | 2.9                              | 2.4                            |
| $\Delta^7$ -stigmastenol                                | 2.9                              |                                |
| $\Delta^7$ -avenasterol                                 | 0.6                              |                                |
| Total                                                   | <b>796</b>                       | <b>362</b>                     |
| <b>Total amount (<math>\mu\text{g/g}</math> dry wt)</b> | <b>1155 <math>\pm</math> 120</b> | <b>392 <math>\pm</math> 47</b> |
