# Supplementary material for: Nonsterol Triterpenoids as Major Constituents ofOlea europaea
Source: Hindawi journal article supplement (doi:10.1155/2012/476595), 2012-01-01
Supplement: f2 [file 476595.f2.pdf]

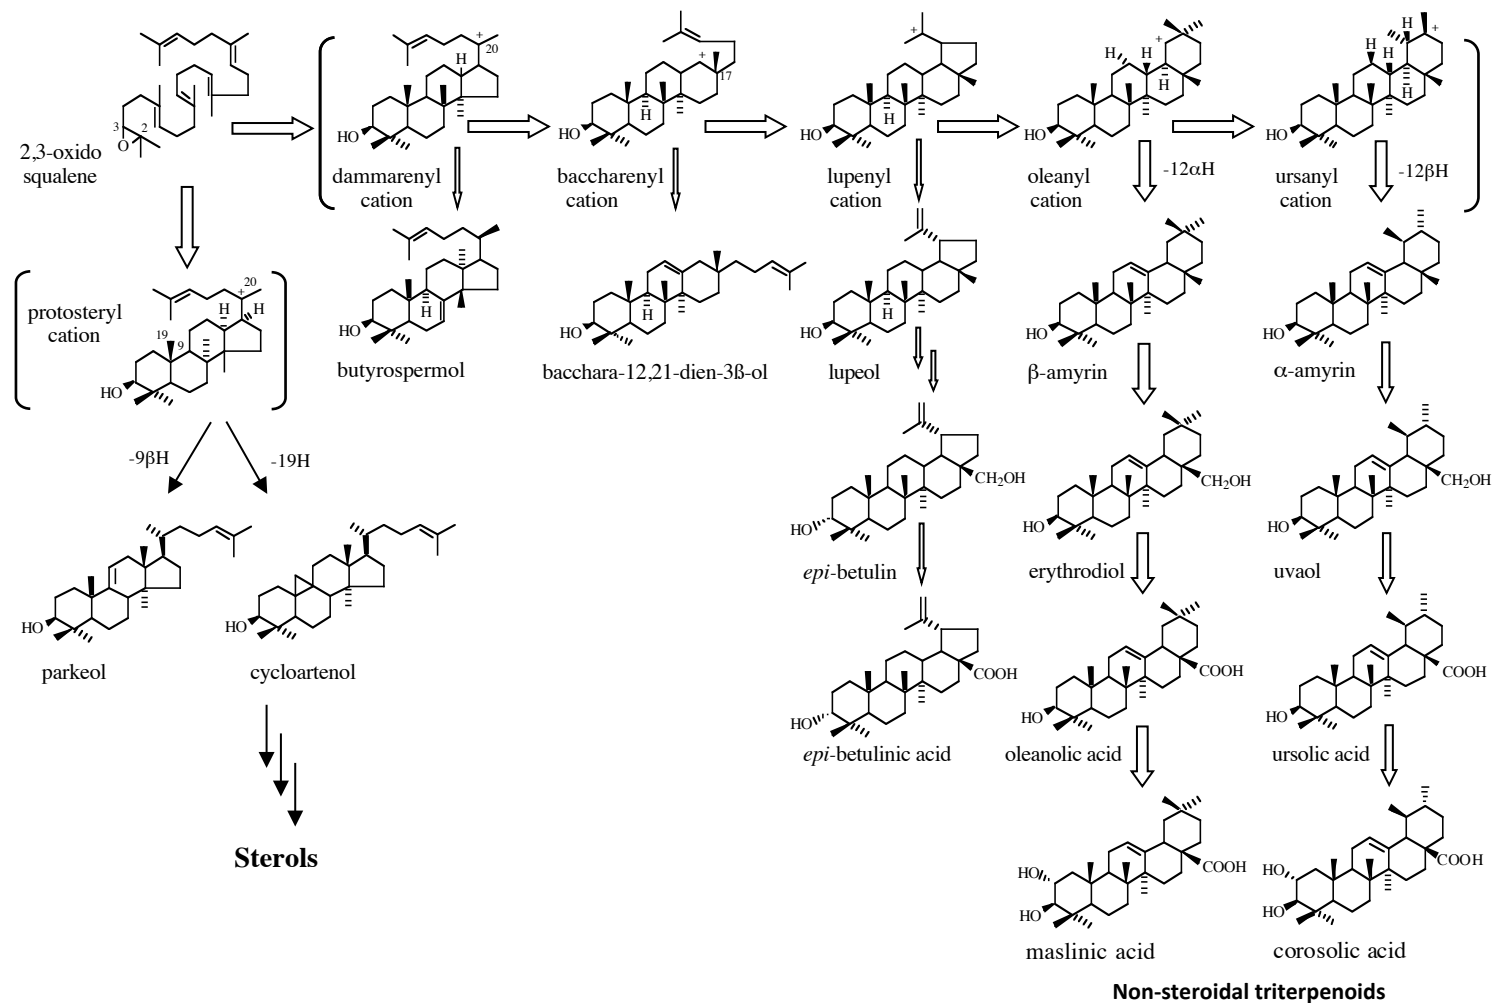

**Figure S1 : Postulated biosynthetic pathway of nonsterol triterpenoids in *Olea europaea***

The width of the arrows is indicative of the relative proportions of the carbon flux between the different families of triterpenoids
